# Supplementary material for: Singlet Fission, Polaron Generation and Intersystem Crossing in Hexaphenyl Film
Source: MDPI journal article supplement (doi:10.3390/molecules27165067), 2022-08-09
Supplement: s1 [file s1]

# Supplementary Materials

## for

### Singlet Fission, Polaron Generation and Intersystem Crossing in Hexaphenyl Film

Wenjun Ni <sup>1</sup>, Tianjiao Li <sup>2</sup>, Christian Kloc <sup>3</sup>, Licheng Sun <sup>2,4</sup> and Gagik G. Gurzadyan <sup>2,\*</sup>

<sup>1</sup>School of Sciences, Hangzhou Dianzi University, Hangzhou 310018, China

<sup>2</sup>State Key Laboratory of Fine Chemicals, Institute of Artificial Photosynthesis, Dalian University of Technology, Dalian 116024, China

<sup>3</sup>School of Materials Science & Engineering, Nanyang Technological University, Singapore 639798, Singapore

<sup>4</sup>Center of Artificial Photosynthesis for Solar Fuels, School of Science, Westlake University, Hangzhou 310024, China

Correspondence: gurzadyan@dlut.edu.cn; Tel: +86-411-8498-6489

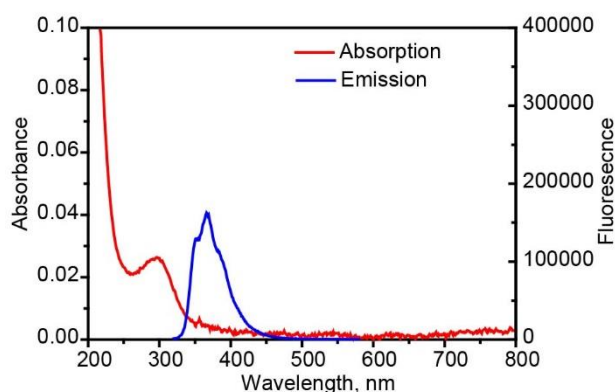

**Figure S1.** Steady state absorption and fluorescence spectra of hexaphenyl in hexane ( $\lambda_{\text{exc}} = 300$  nm).

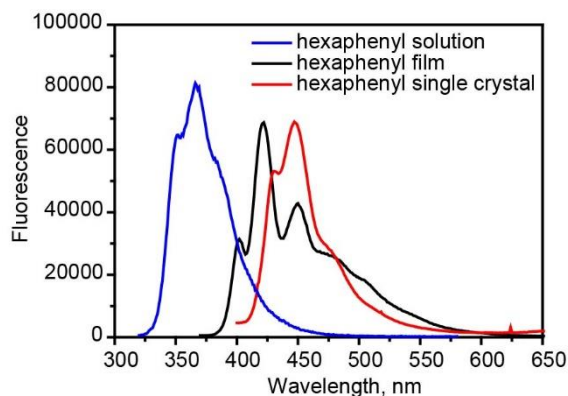

**Figure S2.** Fluorescence of hexaphenyl solution ( $\lambda_{\text{exc}} = 300$  nm), film ( $\lambda_{\text{exc}} = 350$  nm) and single crystal ( $\lambda_{\text{exc}} = 350$  nm).

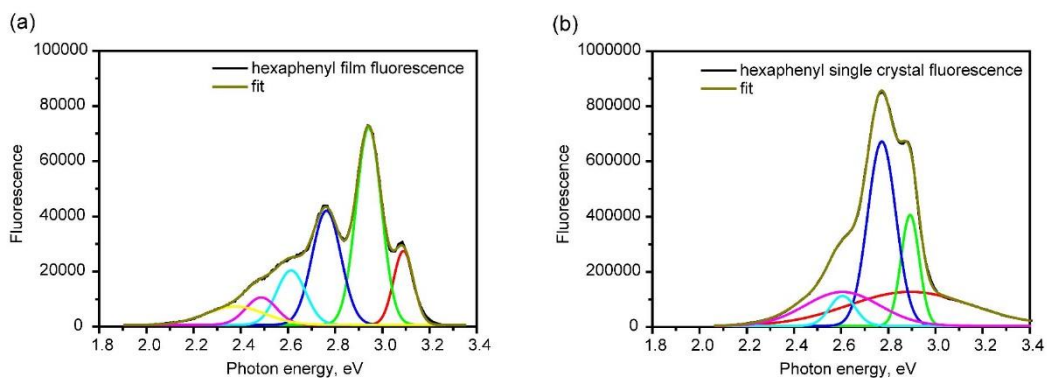

**Figure S3.** Gaussian fit for steady state fluorescence spectra of (a) hexaphenyl film and (b) single crystal.

**Table S1.** Gaussian multipeak fit maxima of the steady state fluorescence spectra of hexaphenyl film and single crystal.

| System         | Maxima of emission bands [eV] |      |      |      |      |      |
|----------------|-------------------------------|------|------|------|------|------|
| Film           | 2.37                          | 2.49 | 2.61 | 2.76 | 2.94 | 3.11 |
| Single crystal |                               |      | 2.60 | 2.77 | 2.89 |      |

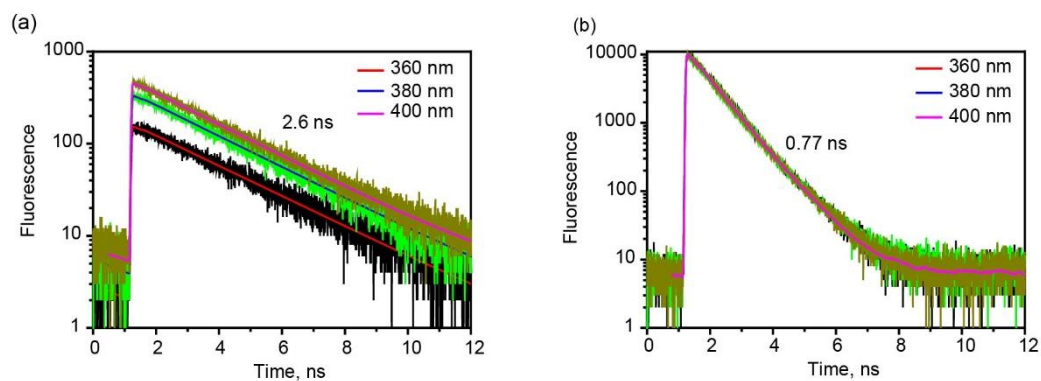

**Figure S4.** Fluorescence decay kinetics of the (a) hexaphenyl crystal and (b) in hexane  $\lambda_{\text{exc}} = 267$  nm at various probe wavelengths.

**Table S2.** Fluorescence decay kinetics of hexaphenyl film, solution and single crystal at various emission wavelengths (TCSPC data).

| $\lambda_{\text{exc}}$ , nm | $\lambda_{\text{probe}}$ , nm | $\tau_1$ , ns | $A_1$ | $\tau_2$ , ns | $A_2$ | $\tau_3$ , ns | $A_3$ |
|-----------------------------|-------------------------------|---------------|-------|---------------|-------|---------------|-------|
| Film<br>360                 | 400                           | 0.24          | 0.62  | 0.76          | 0.35  | 1.6           | 0.03  |
|                             | 420                           | 0.30          | 0.70  | 0.70          | 0.30  | 1.9           | 0.01  |
|                             | 440                           | 0.32          | 0.67  | 0.73          | 0.32  | 2.9           | 0.01  |
|                             | 460                           | 0.32          | 0.60  | 0.91          | 0.34  | 3.9           | 0.06  |
|                             | 480                           | 0.30          | 0.57  | 0.93          | 0.32  | 3.4           | 0.11  |
|                             | 500                           | 0.27          | 0.44  | 1.02          | 0.40  | 3.4           | 0.16  |
|                             | 520                           | 0.26          | 0.42  | 1.05          | 0.40  | 3.5           | 0.18  |
| Crystal<br>267              | 360                           |               |       |               |       | 2.6           | 1     |
|                             | 380                           |               |       |               |       | 2.6           | 1     |
|                             | 400                           |               |       |               |       | 2.6           | 1     |
| Solution<br>267             | 360                           |               |       | 0.77          | 1     |               |       |
|                             | 380                           |               |       | 0.77          | 1     |               |       |
|                             | 400                           |               |       | 0.77          | 1     |               |       |

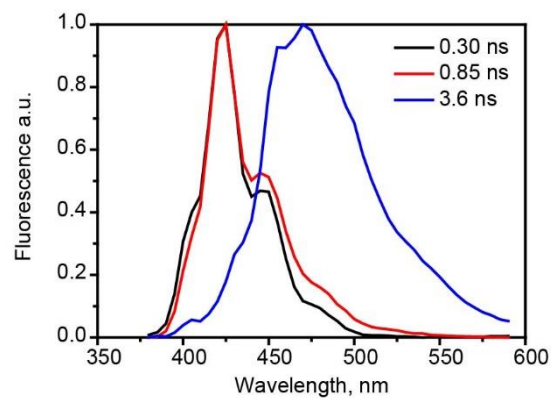

**Figure S5.** Global fit spectra of TCSPC results for hexaphenyl film at  $\lambda_{\text{exc}} = 360$  nm.

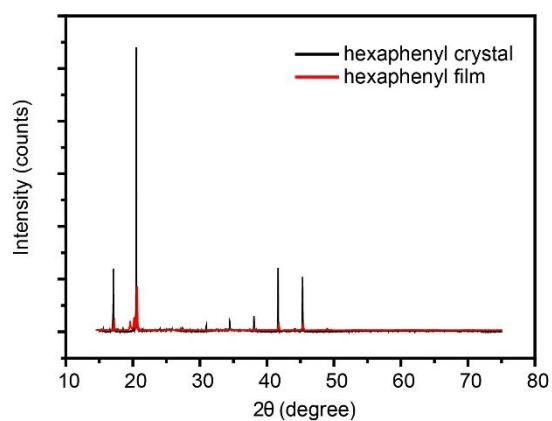

**Figure S6.** X-ray diffraction (XRD) patterns of hexaphenyl film and single crystal presented on the same scale.

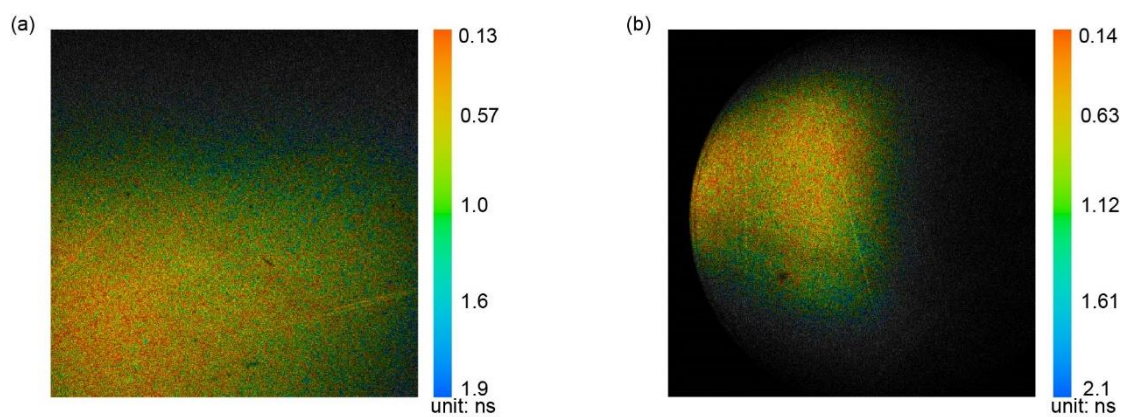

**Figure S7.** Fluorescence lifetime imaging acquired with confocal microscopy. Range size (a):  $1 \times 1$   $\mu\text{m}$ , (b):  $10 \times 10$   $\mu\text{m}$ .

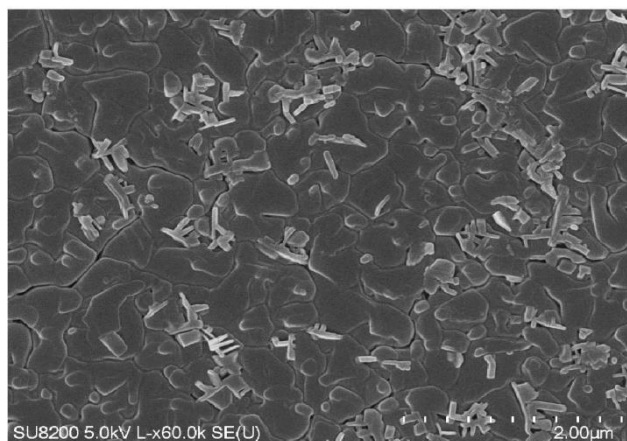

**Figure S8.** Scanning electron microscope (SEM) of hexaphenyl film.

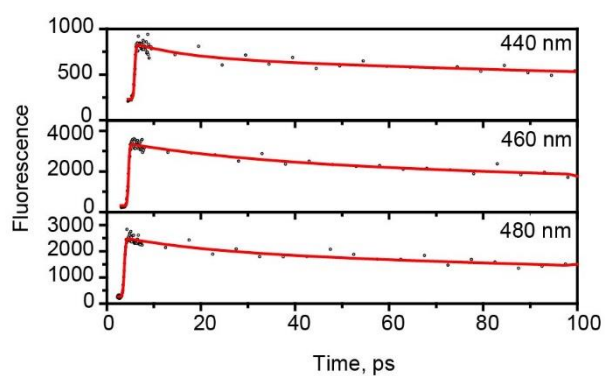

**Figure S9.** Up conversion fluorescence decay kinetics of hexaphenyl film at  $\lambda_{\text{exc}} = 400$  nm.

**Table S3.** Fluorescence decay kinetics of hexaphenyl film at various emission wavelengths (up-conversion data).  $\tau_3$  is fixed to respective TCSPC data.

| $\lambda_{\text{exc}}$ , nm | $\lambda_{\text{probe}}$ , nm | $\tau_1$ , ps | $A_1$ | $\tau_2$ , ps | $A_2$ | $\tau_3$ , ps     | $A_3$ |
|-----------------------------|-------------------------------|---------------|-------|---------------|-------|-------------------|-------|
| 400                         | 440                           | 29            | 0.24  | 250           | 0.74  | 4000 <sup>f</sup> | 0.02  |
|                             | 460                           | 35            | 0.25  | 300           | 0.69  | 4000 <sup>f</sup> | 0.06  |
|                             | 490                           | 27            | 0.22  | 270           | 0.70  | 4000 <sup>f</sup> | 0.08  |

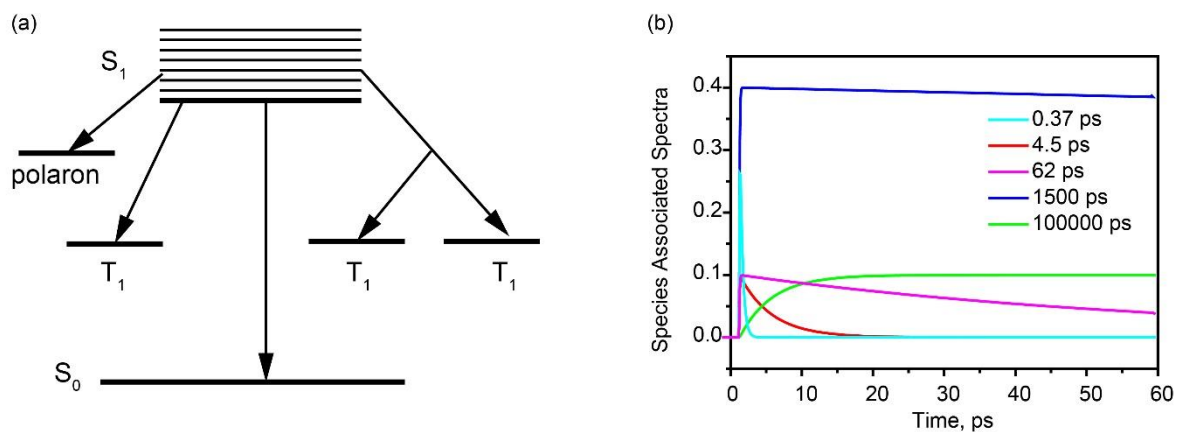

**Figure S10.** Global fit target model (a) and kinetics (b) of Species Associated Spectra.

```
Excitation energies and oscillator strengths:

Excited State 1: Singlet-A  3.0022 eV  412.97 nm  f=2.6586 <S**2>=0.000
121->122  0.70148
This state for optimization and/or second-order correction.
Total Energy, E(TD-HF/TD-KS) = -1386.01198264
Copying the excited state density for this state as the 1-particle RhoCl density.

Excited State 2: Singlet-A  3.7356 eV  331.90 nm  f=0.0000 <S**2>=0.000
120->122  -0.57289
121->123  -0.39899

Excited State 3: Singlet-A  3.9383 eV  314.81 nm  f=0.0000 <S**2>=0.000
120->122  0.40184
121->123  -0.57400
```

**Figure S11.** TD-DFT/(b3lyp/6-31g(d)) calculation of excited singlet state energies of hexaphenyl isolated molecule at  $S_1$  geometry.

Excitation energies and oscillator strengths:

Excited State 1: 3.007-A 0.1408 eV 8803.98 nm f=0.0001 <S\*\*2>=2.011

|             |          |
|-------------|----------|
| 122A ->123A | 0.92075  |
| 122A ->131A | 0.29118  |
| 110B ->121B | 0.10256  |
| 112B ->121B | -0.30610 |
| 120B ->121B | 0.95325  |
| 122A <-123A | 0.64240  |
| 122A <-131A | 0.24087  |
| 112B <-121B | -0.24646 |
| 120B <-121B | 0.64186  |

This state for optimization and/or second-order correction.  
Total Energy, E(TD-HF/TD-KS) = -1387.41406581  
Copying the excited state density for this state as the 1-particle RhoCI density.

Excited State 2: 3.027-A 1.0392 eV 1193.05 nm f=0.0000 <S\*\*2>=2.041

|             |          |
|-------------|----------|
| 122A ->125A | 0.75914  |
| 122A ->126A | -0.17439 |
| 122A ->127A | -0.23375 |
| 122A ->128A | -0.11946 |
| 114B ->121B | 0.10107  |
| 118B ->121B | 0.54314  |

Excited State 3: 3.013-A 1.0921 eV 1135.25 nm f=0.0007 <S\*\*2>=2.020

|             |          |
|-------------|----------|
| 122A ->124A | -0.64054 |
| 122A ->132A | -0.11947 |
| 111B ->121B | 0.13653  |
| 119B ->121B | 0.74909  |

**Figure S12.** TD-DFT/(b3lyp/6-31g(d)) calculation of excited triplet state energies of hexaphenyl isolated molecule at T<sub>1</sub> geometry.

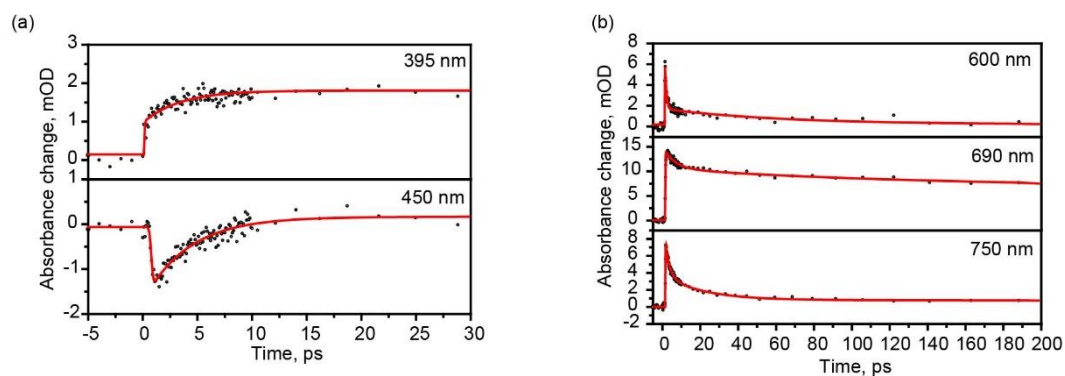

**Figure S13.** Decay kinetics of the hexaphenyl film  $\lambda_{\text{exc}} = 250$  nm at different wavelengths.

**Table S4.** Lifetimes obtained from fit/deconvolution of TA spectra for the hexaphenyl film at  $\lambda_{\text{exc}} = 250$  nm; f = fixed.

| $\lambda_{\text{exc}}$ , nm | $\lambda_{\text{probe}}$ , nm | $\tau_1$ , ps | $A_1$ | $\tau_2$ , ps | $A_2$ | $\tau_3$ , ps | $A_3$ | $\tau_4$ , ps | $A_4$ |
|-----------------------------|-------------------------------|---------------|-------|---------------|-------|---------------|-------|---------------|-------|
| 250                         | 395                           | 3.4           | -0.47 |               |       |               |       | $100000^f$    | 1     |
|                             | 450                           | 4.1           | -0.74 |               |       | 3300          | -0.26 | $100000^f$    | 1     |
|                             | 600                           | 0.80          | 0.76  | 63            | 0.24  |               |       |               |       |
|                             | 690                           | 5.9           | 0.25  | 100           | 0.19  | 1600          | 0.39  | $100000^f$    | 0.17  |
|                             | 750                           | 2.1           | 0.55  | 21            | 0.37  | 2900          | 0.08  |               |       |
